# Supplementary material
Source: MDPI journal article supplement (https://www.mdpi.com/2073-4344/13/7/1058)
Supplement: s1 [file s1]

## **Supplementary Materials**

### **Mesoporous Copper-Cerium Mixed Oxide Catalysts for Aerobic Oxidation of Vanillyl Alcohol**

**Silligandla Nazeer 1,2, Palli Sitaramulu 1,2, Kamma Yogendra 1,2, Palnati Manoj Kumar 1, Benjaram M. Reddy 1,3,\* and Tumula Venkateshwar Rao 1,2,\***

1 Catalysis and Fine Chemicals Department, CSIR–Indian Institute of Chemical Technology, Uppal Road,

Hyderabad 500007, India; nazeerbasha949@gmail.com (S.N.); pallisitaramu@gmail.com (P.S.); kammayogendra@gmail.com (K.Y.); palnatimanoj@iiict.res.in (P.M.K.)

2 Academy of Scientific and Innovative Research (AcSIR), Ghaziabad 201002, India

3 Department of Chemistry and Materials Center for Sustainable Energy & Environment, Birla Institute of

Technology & Science (BITS) Pilani, Hyderabad Campus, Hyderabad 500078, India

\* Correspondence: bmreddy@hyderabad.bits-pilani.ac.in (B.M.R.); tvrao@iiict.res.in (T.V.R.)

**Table S1** Normalised activity of catalysts with respect to BET surface area.

| Entry | Catalyst                                               | SA (m <sup>2</sup> g <sup>-1</sup> ) | Conv. (%) | NA (Conv./SA) x 100 |
|-------|--------------------------------------------------------|--------------------------------------|-----------|---------------------|
| 1     | CuO                                                    | 14                                   | 22        | 157                 |
| 2     | CeO <sub>2</sub>                                       | 51                                   | 35        | 69                  |
| 3     | Cu <sub>0.05</sub> Ce <sub>0.95</sub> O <sub>2-δ</sub> | 75                                   | 73        | 97                  |
| 4     | Cu <sub>0.1</sub> Ce <sub>0.9</sub> O <sub>2-δ</sub>   | 81                                   | 95        | 117                 |
| 5     | Cu <sub>0.15</sub> Ce <sub>0.85</sub> O <sub>2-δ</sub> | 69                                   | 86        | 125                 |

SA = Surface area, Conv. = Conversion, NA = Normalised activity.

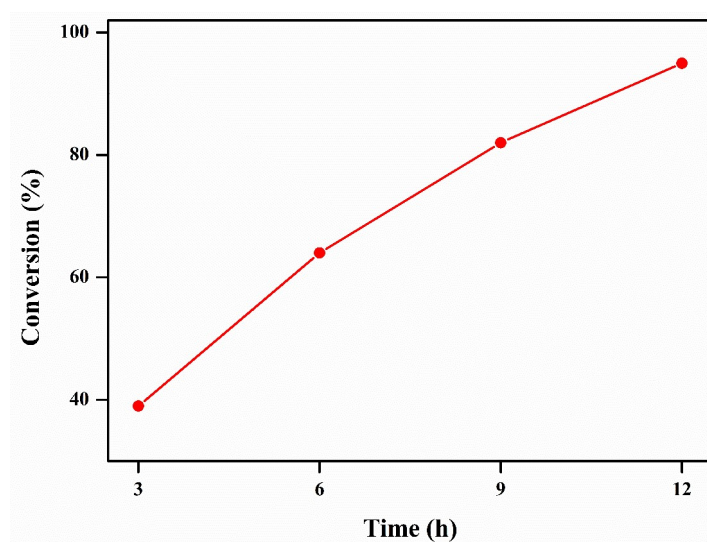

**Figure S1.** Effect of reaction time over  $\text{Cu}_{0.1}\text{Ce}_{0.9}\text{O}_{2-\delta}$  catalyst. Reaction conditions: vanillyl alcohol (200 mg), catalyst (50 mg),  $\text{O}_2$  (balloon), temperature (130 °C), and N, N-dimethylformamide (10 ml).

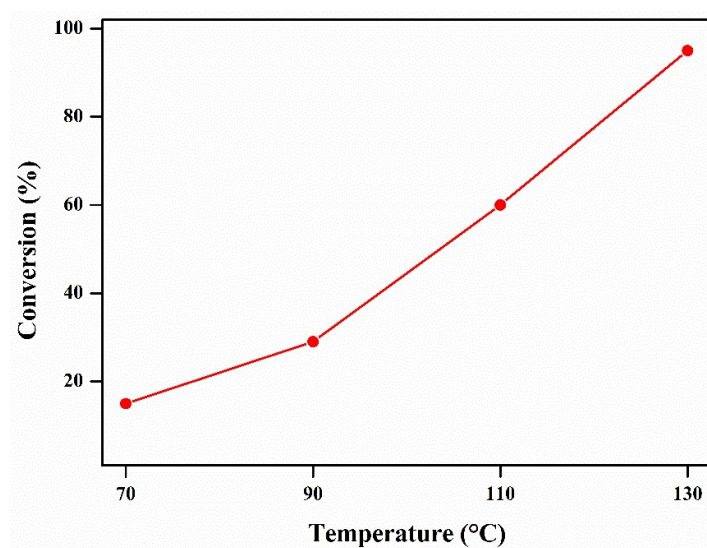

**Figure S2.** Effect of temperature over  $\text{Cu}_{0.1}\text{Ce}_{0.9}\text{O}_{2-\delta}$  catalyst. Reaction conditions: vanillyl alcohol (200 mg), catalyst (50 mg),  $\text{O}_2$  (balloon), time (12 h), and N, N-dimethylformamide (10 ml).

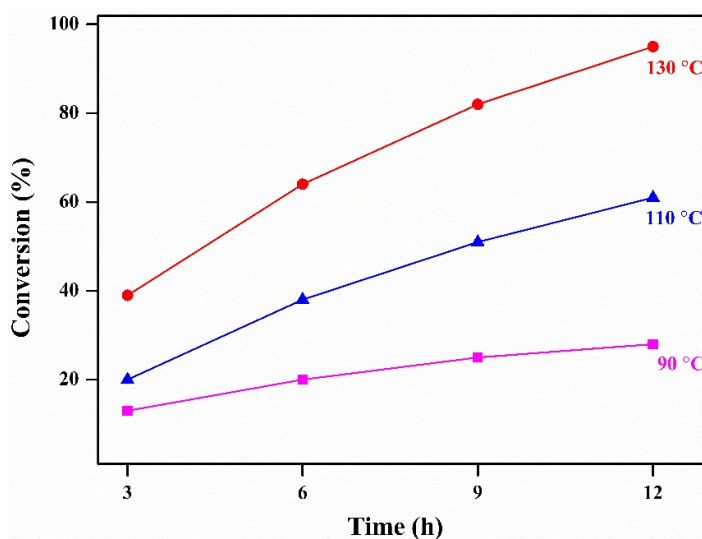

**Figure S3.** Effect of reaction time duration at various temperatures over  $\text{Cu}_{0.1}\text{Ce}_{0.9}\text{O}_{2-\delta}$  catalyst. Reaction conditions: vanillyl alcohol (200 mg), catalyst (50 mg),  $\text{O}_2$  (balloon), and N, N-dimethylformamide (10 ml).

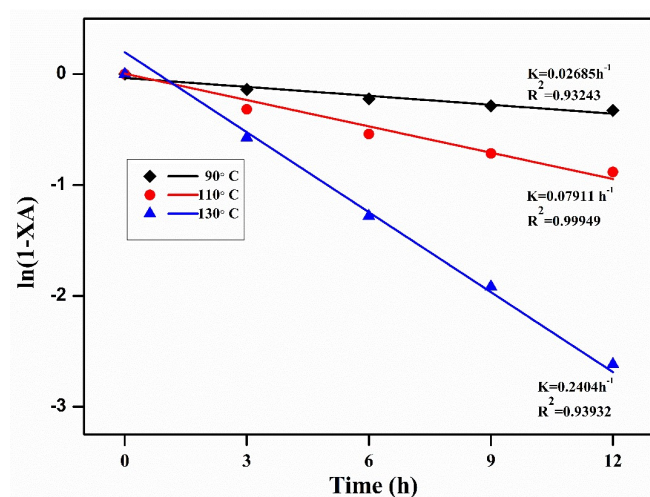

**Figure S4.**  $\ln(1 - X_A)$  versus reaction time duration for oxidation of vanillyl alcohol.

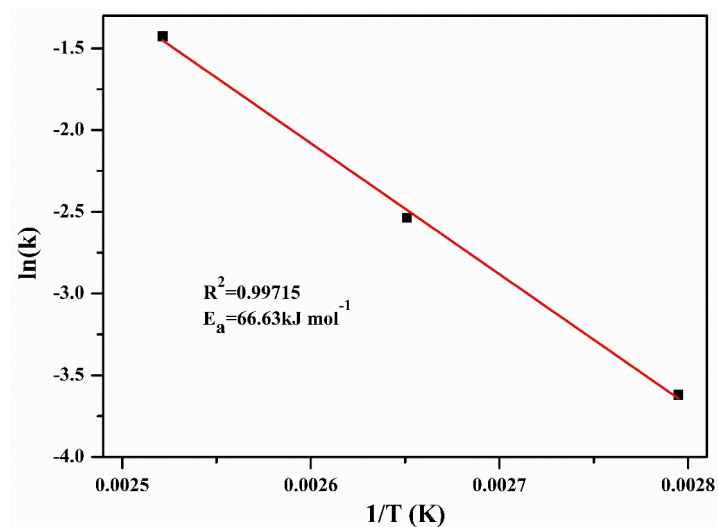

**Figure S5.** Arrhenius plot:  $\ln(k)$  versus  $1/T$  ( $T$  is in Kelvin).

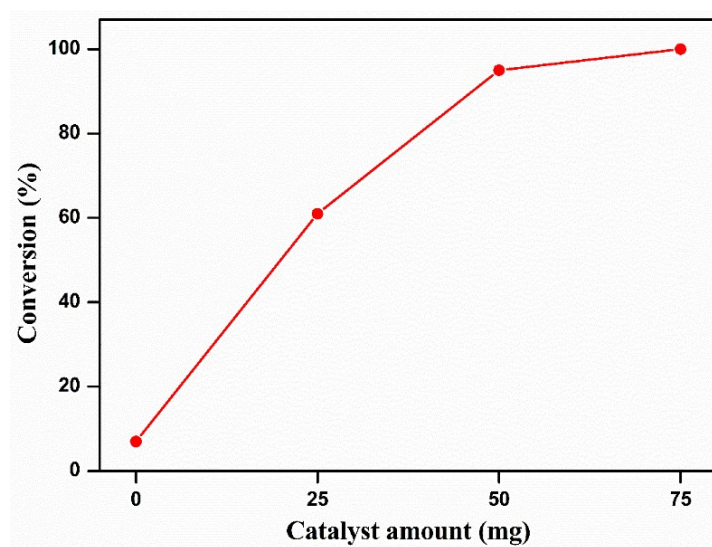

**Figure S6.** Effect of catalyst amount over  $\text{Cu}_{0.1}\text{Ce}_{0.9}\text{O}_{2-\delta}$ . Reaction conditions: vanillyl alcohol (200 mg),  $\text{O}_2$  (balloon), time (12 h), temperature (130 °C), and N, N-dimethylformamide (10 ml).

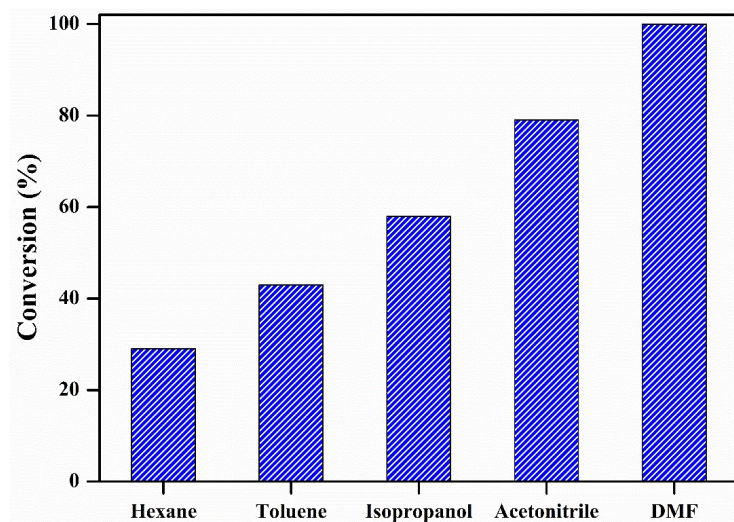

**Figure S7.** Effect of various solvents over  $\text{Cu}_{0.1}\text{Ce}_{0.9}\text{O}_{2-\delta}$  catalyst. Reaction conditions: vanillyl alcohol (500 mg),  $\text{O}_2$  (20 bar), time (4 h), catalyst (100 mg), temperature (130 °C), and solvent (25 ml).

**Table S2** Comparison of present results with previously reported studies.

| Entry <sup>a</sup>   | Catalyst                                      | Oxidant              | Temp. (°C) | Pres. (bar) | Solvent | Time (hours) | Cat. amnt. (mg) | VA amnt. (mg) | Conv. (%) | Sel. (%) |
|----------------------|-----------------------------------------------|----------------------|------------|-------------|---------|--------------|-----------------|---------------|-----------|----------|
| 1<br>(Ref. 22)       | Co–Mn Mixed oxide                             | O <sub>2</sub> (air) | 140        | 21          | ACN     | 2            | 100             | 500           | 62        | 83       |
| 2<br>(Ref. 19)       | Co <sub>3</sub> O <sub>4</sub> nano-particles | O <sub>2</sub> +base | 80         | 6.8         | IPA     | 6            | 100             | 500           | 80        | 98       |
|                      |                                               | O <sub>2</sub>       |            |             |         |              |                 |               | 25        | 88       |
| 3<br>(Ref. 9)        | mesoporous Cu–Ti                              | O <sub>2</sub> (air) | 120        | 21          | ACN     | 2            | 150             | 464           | 94        | 86       |
| 4<br>(Ref. 35)       | Mn-doped ceria solid solution                 | O <sub>2</sub>       | 140        | 20          | ACN     | 4            | 100             | 500           | 89        | 95       |
| 5<br>(Ref. 36)       | Ce–Zr–O solid solution                        | O <sub>2</sub>       | 140        | 20          | ACN     | 5            | 150             | 464           | 98        | 99       |
| 6<br>(Ref. 37)       | Ce–Fe mixed oxide                             | O <sub>2</sub>       | 140        | 20          | ACN     | 5            | 100             | 300           | 91        | 99       |
| 7<br>(Ref. 8)        | N-RGO/Mn <sub>3</sub> O <sub>4</sub>          | O <sub>2</sub>       | 120        | atm.        | DMF     | 12           | 20              | 77            | 92.5      | 91.4     |
| 8<br>(Present study) | CuO–CeO <sub>2</sub>                          | O <sub>2</sub>       | 130        | atm.        | DMF     | 12           | 50              | 200           | 95        | 100      |

<sup>a</sup> References given in the article. Temp. = Temperature, Pres. = Pressure, Cat. = catalyst, amnt. = Amount, VA = Vanillyl alcohol, Conv. = Conversion, Sel. = Selectivity, ACN = Acetonitrile, IPA = Isopropyl alcohol, DMF = N, N-Dimethylformamide, atm. = Atmospheric, b = present work.
